# Supplementary material for: Saccharomyces cerevisiae: a patulin degradation candidate bothin vitroandin vivo
Source: Royal Society of Chemistry journal article supplement (doi:10.1039/d2fo03419k), 2023-01-01
Supplement: d2fo03419k1.pdf [file d2fo03419k1.pdf]

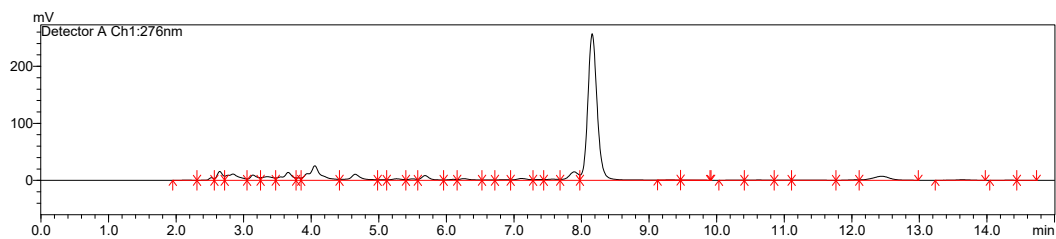

**Figure S1.** The liquid chromatogram of crude extract of patulin.

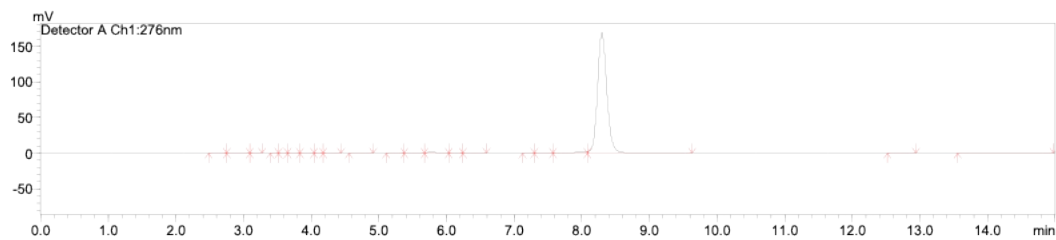

**Figure S2.** The liquid chromatogram of purification of patulin.
